# Supplementary material for: Molecular Characterization of A Novel Effector Expansin-like Protein from Heterodera avenae that Induces Cell Death in Nicotiana benthamiana
Source: PubMed Central journal article supplement (PMC5093861; doi:10.1038/srep35677), 2016-11-03
Supplement: srep35677-s1.pdf [file srep35677-s1.pdf]

**Molecular Characterization of A Novel Effector Expansin-like Protein from *Heterodera avenae* that Induces Cell Death in *Nicotiana benthamiana***

Jing Liu<sup>1,2†</sup>, Huan Peng<sup>1†</sup>, Jiangkuan Cui<sup>1</sup>, Wenkun Huang<sup>1</sup>, Lingan Kong<sup>1</sup>, Jihong Liu Clarke<sup>3</sup>, Heng Jian<sup>2</sup>, Guo Liang Wang<sup>1,4</sup>, Deliang Peng<sup>1\*</sup>

Supplementa Table1. List of 39 *Heterodera avenae* candidate effectors

| Unigene ID        | Hit gene                                                                             | Hit<br>Genbank<br>accession | E-value | Bitsc<br>ore |
|-------------------|--------------------------------------------------------------------------------------|-----------------------------|---------|--------------|
| comp34893_c0_seq1 | Globodera rostochiensis secreted SPRY domain-containing protein 18mRNA, complete cds | JX026919                    | 1E-30   | 112          |
| comp61735_c0_seq1 | Globodera pallida clone GPS9-13 RBP-1 protein (rbp-1) mRNA, complete cds             | FJ882995                    | 9E-32   | 117          |
| comp52750_c1_seq1 | Globodera pallida mRNA for putative SEC-2 protein mRNA, complete cds                 | Y09293                      | 1E-19   | 81.6         |
| comp62055_c0_seq3 | Ditylenchus destructor beta-1,4-endoglucanase (eng-2) mRNA, complete cds             | FJ374266                    | 2E-92   | 280          |
| comp53548_c0_seq2 | Dictyocaulus viviparus cholesterol acyltransferase mRNA, complete cds                | JX026919                    | 4E-34   | 123          |
| comp64895_c3_seq2 | Heterodera avenae acid phosphatase precursor (Ha-acp-1) mRNA, complete cds           | JQ341956                    | 5E-135  | 399          |
| comp63317_c1_seq1 | Heterodera avenae expansin B1 mRNA, complete cds                                     | HQ386233                    | 0       | 515          |
| comp64381_c2_seq1 | Heterodera avenae pectate lyase 1 (PEL1) mRNA, complete cds                          | GQ998895                    | 0       | 646          |

|                   |                                                                                                      |          |        |      |
|-------------------|------------------------------------------------------------------------------------------------------|----------|--------|------|
| comp50047_c0_seq2 | Heterodera glycines hypothetical esophageal gland cell secretory protein 4 (hsp4) mRNA, complete cds | AF273731 | 4E-70  | 224  |
| comp57204_c0_seq1 | Heterodera glycines beta-1,4-endoglucanase precursor (GR-eng1)                                       | AF004523 | 4E-169 | 486  |
| comp34808_c0_seq1 | Heterodera glycines beta-1,4-endoglucanase-4 mRNA, complete cds                                      | AY043224 | 2E-85  | 261  |
| comp62243_c0_seq1 | Heterodera glycines beta-1,4-endoglucanase-4 mRNA, complete cds                                      | AY043224 | 7E-163 | 458  |
| comp60159_c1_seq1 | Heterodera glycines cellulase ENG-5 gene, complete cds                                               | AY336935 | 1E-162 | 458  |
| comp77730_c0_seq1 | Heterodera glycines chitinase mRNA, complete cds                                                     | AF468679 | 3E-178 | 499  |
| comp67130_c0_seq1 | Heterodera glycines hypothetical esophageal gland cell secretory protein 6 (hsp6) mRNA,              | AF273733 | 7E-150 | 420  |
| comp65961_c0_seq1 | Heterodera glycines putative gland protein G12H04 mRNA, complete cds                                 | AF490244 | 1E-38  | 143  |
| comp62389_c0_seq3 | Heterodera glycines putative gland protein G26D05 mRNA, complete cds                                 | AY101191 | 1E-168 | 473  |
| comp63301_c0_seq1 | Heterodera glycines putative gland protein G27D09 mRNA, complete cds                                 | AY101190 | 2E-10  | 55.5 |
| comp47703_c0_seq1 | Heterodera schachtii annexin 4F01 mRNA, complete cds                                                 | FJ768021 | 1E-73  | 232  |
| comp55464_c0_seq1 | Heterodera schachtii annexin 4F01 mRNA, complete cds                                                 | FJ768021 | 2E-165 | 465  |
| comp52052_c0_seq1 | Meloidogyne incognita calreticulin mRNA, complete cds                                                | AF402771 | 2E-92  | 289  |

|                   |                                                                                         |          |       |      |
|-------------------|-----------------------------------------------------------------------------------------|----------|-------|------|
| comp64559_c0_seq1 | Meloidogyne incognita glutathione S-transferase-1 (gsts-1) mRNA, complete cds           | EF429119 | 1E-48 | 166  |
| comp35613_c0_seq1 | Meloidogyne incognita mRNA for putative aspartyl protease precursor (asp2 gene)         | FN179274 | 3E-27 | 109  |
| comp64193_c0_seq1 | Meloidogyne incognita mRNA for putative aspartyl protease precursor (asp2 gene)         | FN179274 | 1E-26 | 107  |
| comp53976_c0_seq2 | Meloidogyne incognita putative esophageal gland cell secretory protein 21 (msp21) mRNA, | AY134440 | 2E-23 | 97.8 |
| comp69427_c0_seq1 | Meloidogyne incognita putative esophageal gland cell secretory protein 21 (msp21) mRNA, | AY134440 | 5E-09 | 53.1 |
| comp67352_c0_seq1 | Meloidogyne incognita putative esophageal gland cell secretory protein 26 (msp26) mRNA, | AY135362 | 5E-84 | 258  |
| comp62468_c0_seq1 | Hypothetical protein                                                                    |          |       |      |
| comp63170_c0_seq2 | Hypothetical protein                                                                    |          |       |      |
| comp64896_c2_seq2 | Hypothetical protein                                                                    |          |       |      |
| comp64165_c2_seq9 | Hypothetical protein                                                                    |          |       |      |
| comp63625_c0_seq1 | Hypothetical protein                                                                    |          |       |      |
| comp60707_c0_seq2 | Hypothetical protein                                                                    |          |       |      |
| comp34853_c0_seq1 | Hypothetical protein                                                                    |          |       |      |

|                   |                      |  |  |  |
|-------------------|----------------------|--|--|--|
| comp67308_c0_seq1 | Hypothetical protein |  |  |  |
| comp63997_c0_seq1 | Hypothetical protein |  |  |  |
| comp62948_c2_seq1 | Hypothetical protein |  |  |  |
| comp55920_c0_seq3 | Hypothetical protein |  |  |  |
| comp59782_c0_seq3 | Hypothetical protein |  |  |  |

Supplemental Table2. List of primers in this study.

| Primer Name                  | Primer sequences (5'-3')              |
|------------------------------|---------------------------------------|
| HaEXPB2F                     | ATGTATACATTTCTCTCTTTGTTTG             |
| HaEXPB2R                     | TCAGCATGGTTTAAGGTTTG                  |
| HaEXPB2F( <i>Bam</i> HI)     | CGGGATCC<br>ATGTATACATTTCTCTCTTTGTTTG |
| HaEXPB2FNS( <i>Bam</i> HI)   | CGGGATCC ATGGATGTCACGGCAACG           |
| HaEXPB2R ( <i>Hind</i> III)  | CCCAAGCTT GCATGGTTTAAGGTTTG           |
| HaEXPB2R1 ( <i>Hind</i> III) | CCCAAGCTT<br>AAAAGCAGAAGTGGACAAGTCC   |
| HaEXPB2R3 ( <i>Hind</i> III) | CCCAAGCTT AATCAATTGGACGGTCGG          |
| HaEXPB2-4R                   | TCAATCAAGACATCGGCCAAAACAATG           |
| HaEXPB2-4F                   | GGCCGATGTC<br>TTGATTGAGACTAAATATTTCG  |
| HaEXPB2-5F                   | TGACTACATCTTTTTGGAGCCTG               |
| HaEXPB2-5R                   | CAAAAAGATGTAGTCAATCTTTATGCAA<br>A     |

|              |                                                |
|--------------|------------------------------------------------|
| HaEXPB2-6R   | TTCCCCTTTTGGACGGTCGG                           |
| HaEXPB2-6F   | GTCCAAAAGGGGAAAAC TTT                          |
| HaEXPB2QF    | CACGGCAACGCTCAAGACAC                           |
| HaEXPB2QR    | GCCCTGAACATTGATTCCACC                          |
| GAPDH-qS1    | AGCGGCACAGAACATCATCC                           |
| GAPDH-qAS1   | GGTCCTCCGTGTAGCCCAA                            |
| SH- HaEXPB2F | AAAATGGTGGAAATCAATG TTCAGGG                    |
| SH- HaEXPB2R | CAGTCAAAGTTTTCCCCTTGTAGTCA                     |
| DsHaEXPB2F   | TAATACGACTCACTATAGGGACGGCAA<br>CGCTCAAGACACT   |
| DsHaEXPB2FR  | TAATACGACTCACTATAGGGCCTGAACA<br>TTGATTCCACCATT |
| GFPT7F       | TAATACGACTCACTATAGGGGCACTACT<br>GGAAAAC TACCTG |
| GFPT7R       | TAATACGACTCACTATAGGGGCACGTGT<br>CTTGTAGTTCC    |
| UBP22-F      | GCCAAAGCTGTGGAGAAAAG                           |

UBP22-R

TGTTTAGGCGGAACGGATAC



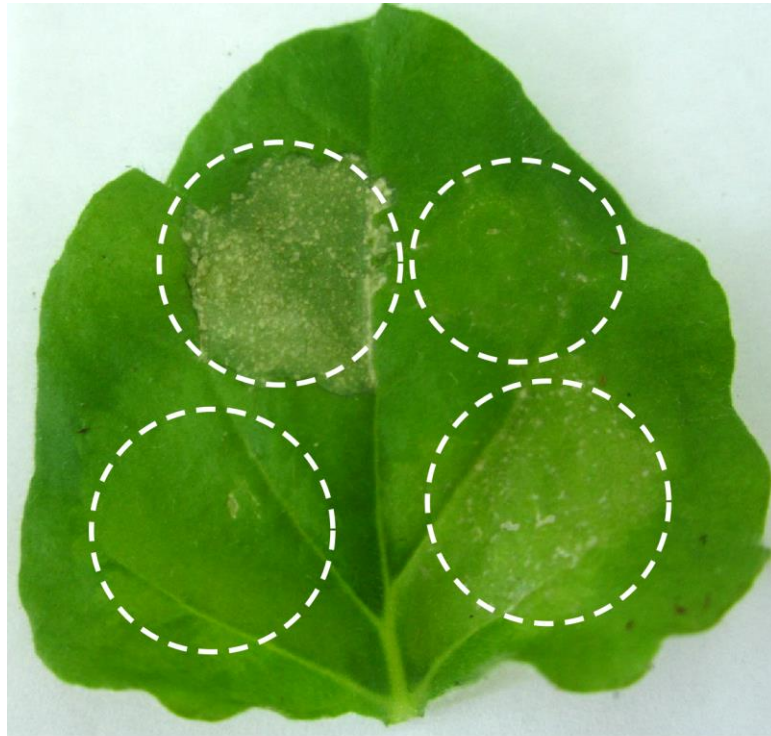

|        |           |
|--------|-----------|
| Bax    | HaEXPB1NS |
| Vector | HaEXPB1FL |

**Supplemental Fig S1. Transient expression HaEXPB1 induces cell death in *N. benthamiana*.** Agroinfiltration was performed on one leaf with *Agrobacterium tumefaciens* carrying an empty vector control (pYBA1143), a positive control (Bax), constructs with full-length HaEXPB1 (HaEXPB2FL), or constructs lacking a signal peptide sequence HaEXPB1(HaEXPB1NS), respectively. Cell death symptoms were assessed at 5 dpi.

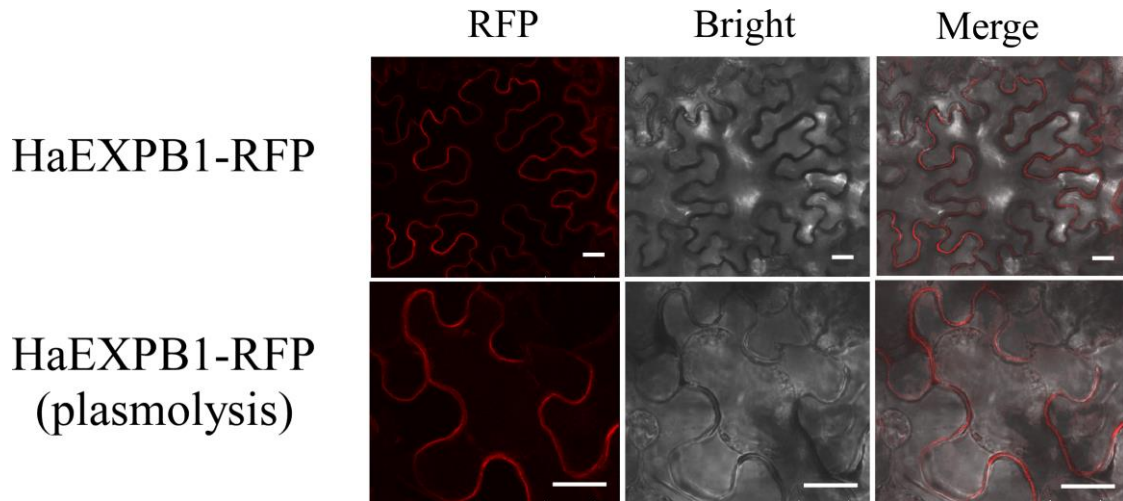

**Supplementa Fig S2. Subcellular localization of transiently expressed HaEXPB1-RFP fusions in *N. benthamiana* leaves.** The upper panel was HaEXPB1-RFP in normal cell, the lower panel was HaEXPB1-RFP in plasmolysed cell. Scale bar = 20  $\mu\text{m}$ .

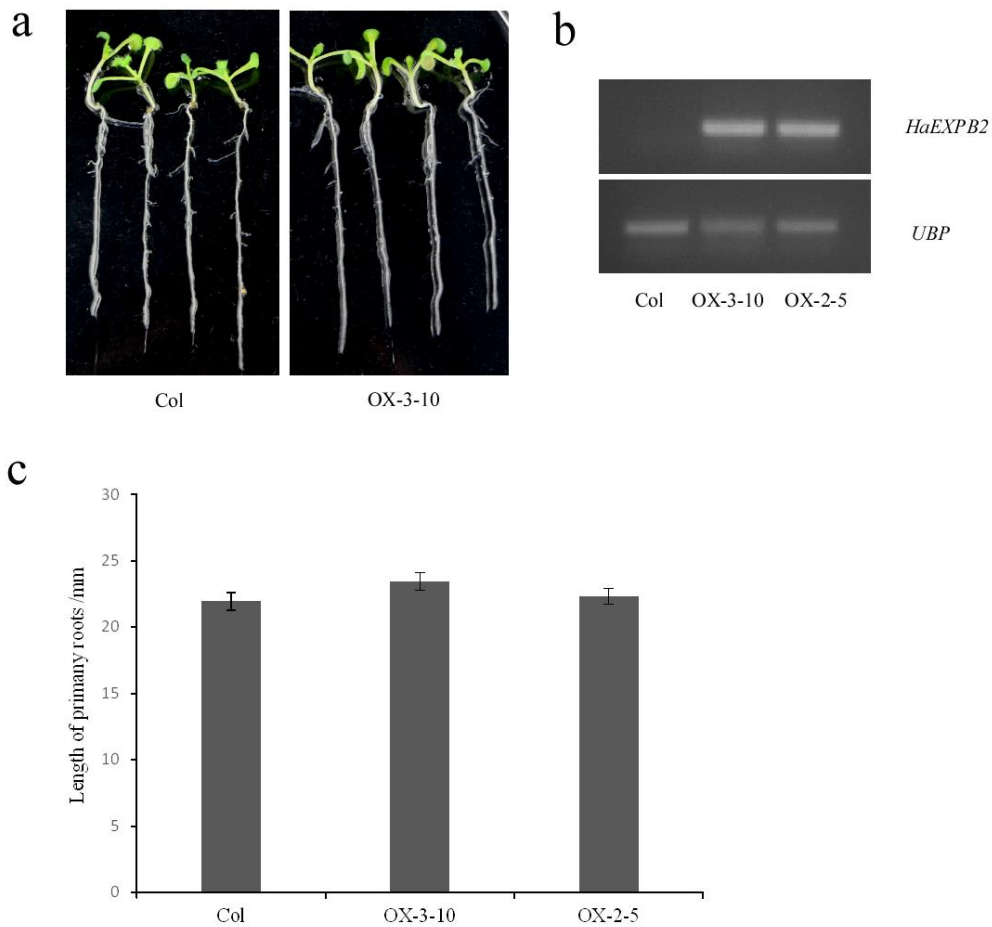

**Supplemental Fig S3. Over expressed HaEXPB2 in *A. thaliana***

(a) The phenotype of over-expressing HaEXPB2 *A. thaliana*.

(b) RT-PCR confirmed the expression level of HaEXPB2 in transgenic *A.*

*thaliana* lines OX-3-10, OX-2-5 compared with the WT (Col). (c) The root

growth of HaEXPB2 *A. thaliana* lines OX-3-10, OX-2-5 and WT. Data are

presented as means  $\pm$ SD from 20 plants.
